# Supplementary material
Source: publisher site journal article supplement (https://www.dovepress.com/article/250630)
Supplement: Supplementary file 1 [file get_supplementary_file.php]

**Supplementary materials**


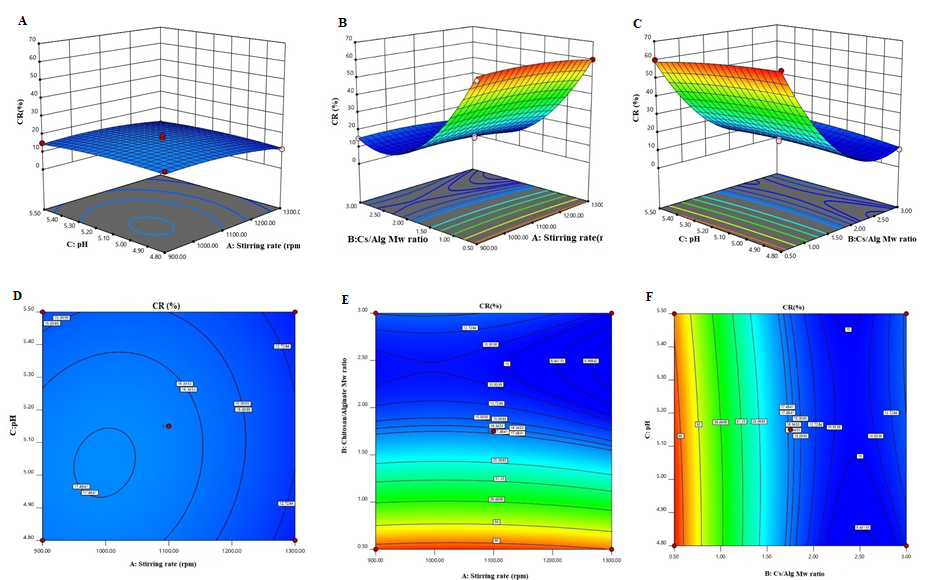


**Supplementary Figure 1**. 3D Response surface plots (A−C) and contour plots (D−F) for the mean CR (%) of Cs/Alg/B NPs. 3D and contour graphs are the preservative relative relationship between two variables on the CR (%) of Cs/Alg/B NPs. Contour plots show a three-dimensional surface on a two-dimensional plane. It graphs two predictor variables X Y on the y-axis and a [response variable](https://www.statisticshowto.com/explanatory-variable/) Z as contours. CR: cumulative release (%), Cs/Alg/B NPs: rhBMP-2 loaded chitosan/alginate nanoparticles.

**
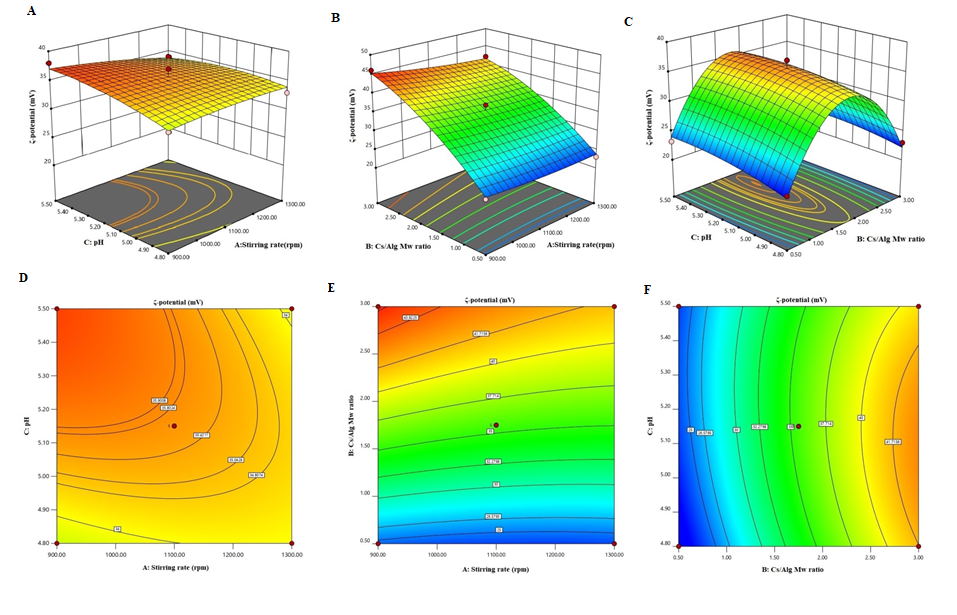
**

**Supplementary Figure 2**. 3D Response surface plots (A−C) and contour plots (D−F) for the mean ζ-potential of Cs/Alg/B NPs. 3D and contour graph are the preservative relative relationship between two variables on the ζ-potential of Cs/Alg/B NPs. Contour plots show a three-dimensional surface on a two-dimensional plane. It graphs two predictor variables X Y on the y-axis and a [response variable](https://www.statisticshowto.com/explanatory-variable/) Z as contours. Cs/Alg/B NPs: rhBMP-2 loaded chitosan/alginate nanoparticles.


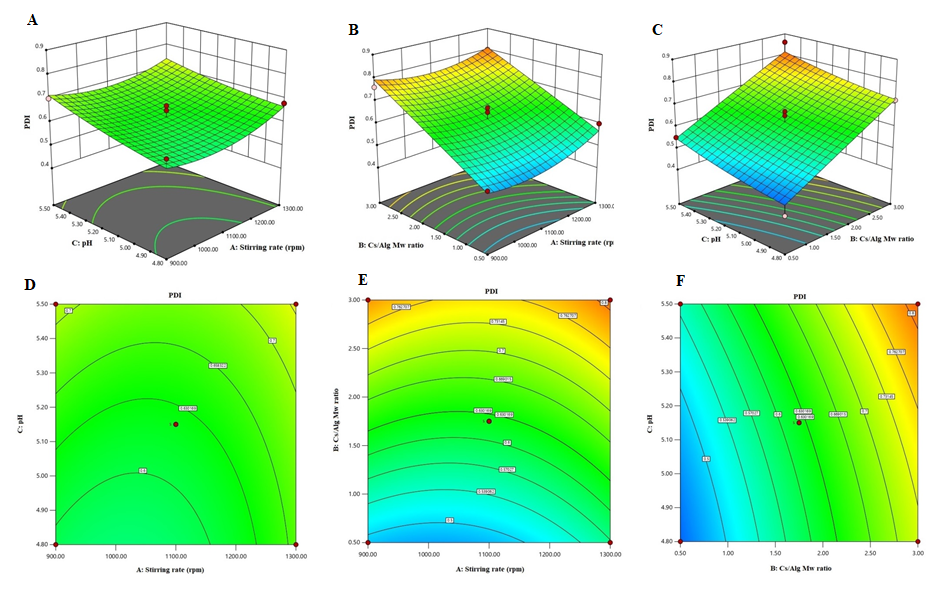


**Supplementary Figure 3**. 3D Response surface plots (A−C) and contour plots (D−F) for the mean PDI of Cs/Alg/B NPs. 3D and contour graphs are preservative relative relationships between two variables on the PDI of Cs/Alg/B NPs. Contour plots show a three-dimensional surface on a two-dimensional plane. It graphs two predictor variables X Y on the y-axis and a [response variable](https://www.statisticshowto.com/explanatory-variable/) Z as contours, PDI: polydispersity index, Cs/Alg/B NPs: rhBMP-2 loaded chitosan/alginate nanoparticles.


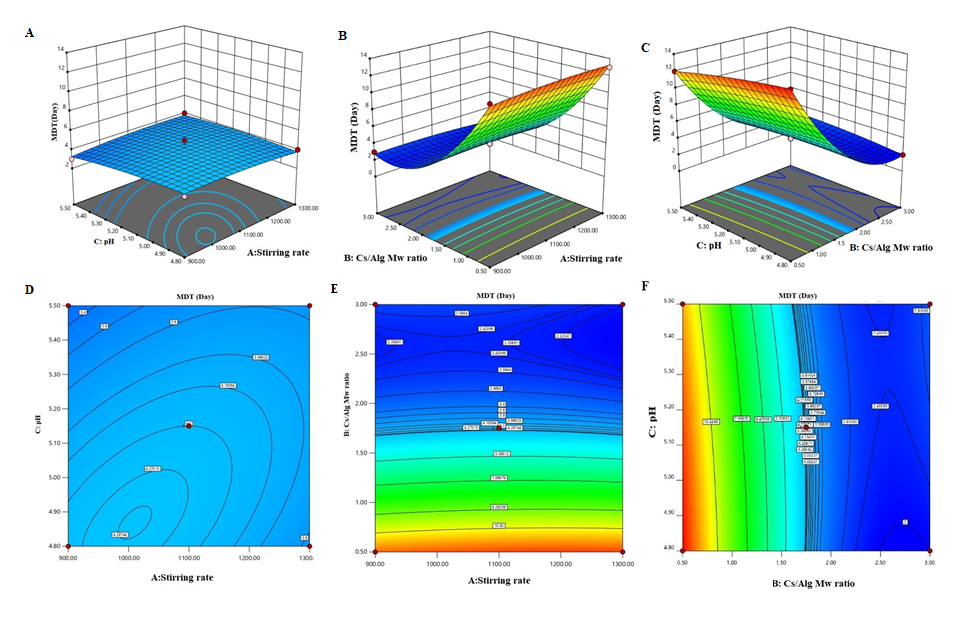
**Supplementary Figure 4**. 3D Response surface plots (A−C) and contour plots (D−F) for the mean MDT of Cs/Alg/B NPs. 3D and contour graphs are the preservative relative relationship between two variables on the MDT of Cs/Alg/B NPs. Contour plots show a three-dimensional surface on a two-dimensional plane. It graphs two predictor variables X Y on the y-axis and a [response variable](https://www.statisticshowto.com/explanatory-variable/) Z as contours. MDT: morphological degradation time, Cs/Alg/B NPs: rhBMP-2 loaded chitosan/alginate nanoparticles.


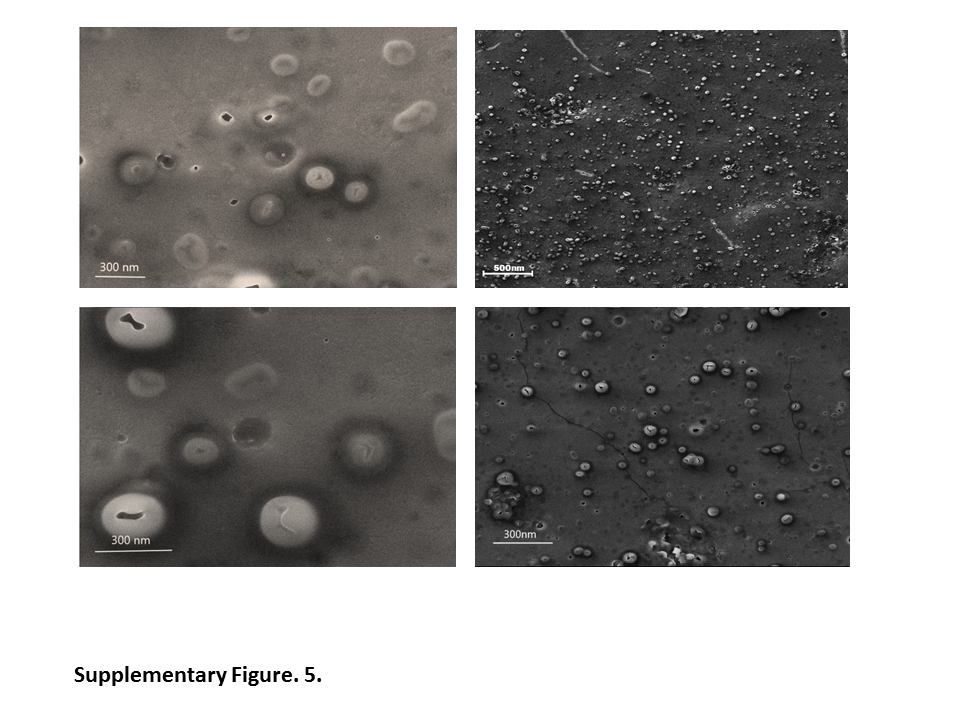


**Supplementary Figure 5.** Extra micrograph SEM images of optimized Cs/Alg/B NPs Cs/Alg Mw ratio =1, stirring rate =5, pH=5.3, Cs/Alg/B NPs: rhBMP-2 loaded chitosan/alginate nanoparticles.
